# Supplementary material for: A targeted near-infrared nanoprobe for deep-tissue penetration and imaging of prostate cancer
Source: Royal Society of Chemistry journal article supplement (doi:10.1039/d0bm01970d), 2021-01-01
Supplement: d0bm01970d1.pdf [file d0bm01970d1.pdf]

## Supporting Information

### Targeted near-infrared nanoprobe for deep-tissue penetration and imaging of prostate cancer

Mena Asha Krishnan,<sup>a</sup> Kratika Yadav,<sup>a</sup> Paul Roach,<sup>†c</sup> Venkatesh Chelvam,<sup>†a,b</sup>

- a) Department of Biosciences and Biomedical Engineering, Indian Institute of Technology Indore, Indore 453 552, India.
- b) Department of Chemistry, Indian Institute of Technology Indore, Indore 453 552, India.
- c) Department of Chemistry, University of Loughborough, Leicestershire LE11 3TU, United Kingdom

†To whom correspondence should be addressed.

Dr. Venkatesh Chelvam,  
Email ID: [cvenkat@iiti.ac.in](mailto:cvenkat@iiti.ac.in),  
Phone: +91-731-6603343

Dr. Paul Roach,  
Email ID: [p.roach@lboro.ac.uk](mailto:p.roach@lboro.ac.uk),  
Phone: +44 (0) 1509 223 057

## ELECTRONIC SUPPORTING INFORMATION

|     |                                                                                                                         |    |
|-----|-------------------------------------------------------------------------------------------------------------------------|----|
| 1.  | <sup>1</sup> H NMR spectrum of <b>3</b>                                                                                 | 3  |
| 2.  | <sup>13</sup> C NMR spectrum of <b>3</b>                                                                                | 4  |
| 3.  | <sup>1</sup> H NMR spectrum of <b>4</b>                                                                                 | 5  |
| 4.  | <sup>13</sup> C NMR spectrum of <b>4</b>                                                                                | 6  |
| 5.  | High Resolution Mass Spectrometry data for DUPA-SH linker <b>11</b>                                                     | 7  |
| 6.  | Analytical LC data of DUPA-SH linker <b>11</b>                                                                          | 8  |
| 7.  | Hydrodynamic radius of QD655 and PSMA-QD655                                                                             | 9  |
| 8.  | Particle characterization data of QD655 and PSMA-QD655                                                                  | 10 |
| 9.  | Cytotoxicity study of PSMA-QD655 after 12 h treatment                                                                   | 11 |
| 10. | Flow cytometry analysis of LNCaP spheroid co-labelled with fluorescein diacetate (FDA) and propidium iodide (PI) stain. | 12 |

# <sup>1</sup>H NMR spectrum of 3

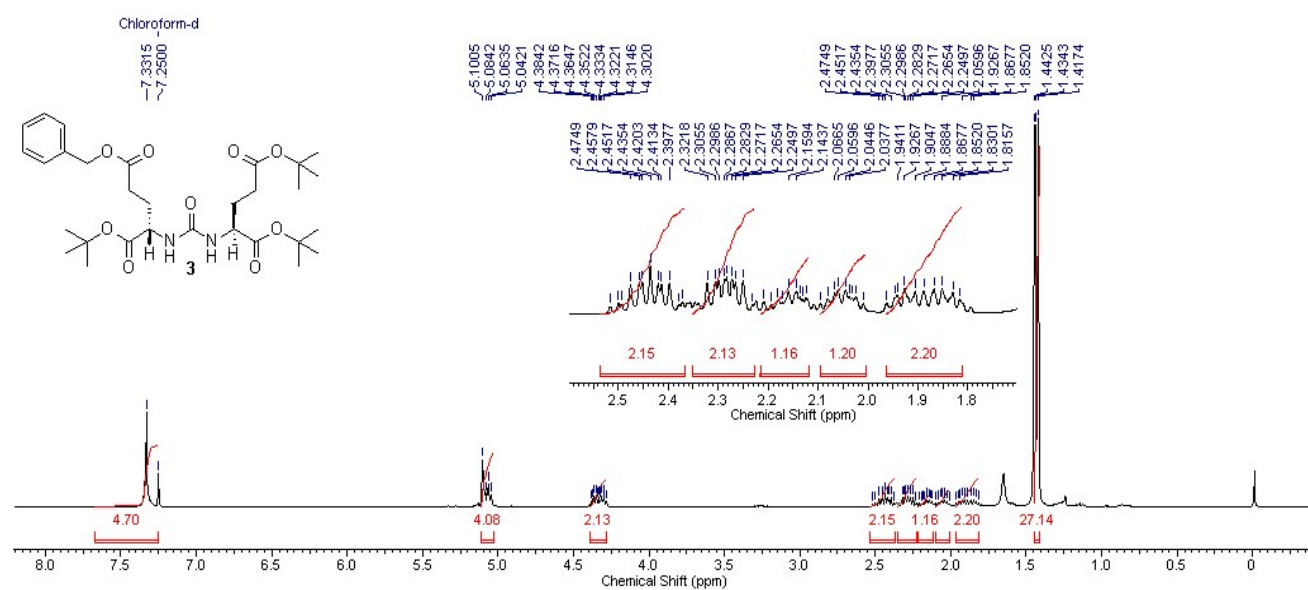

# <sup>13</sup>C NMR spectrum of 3

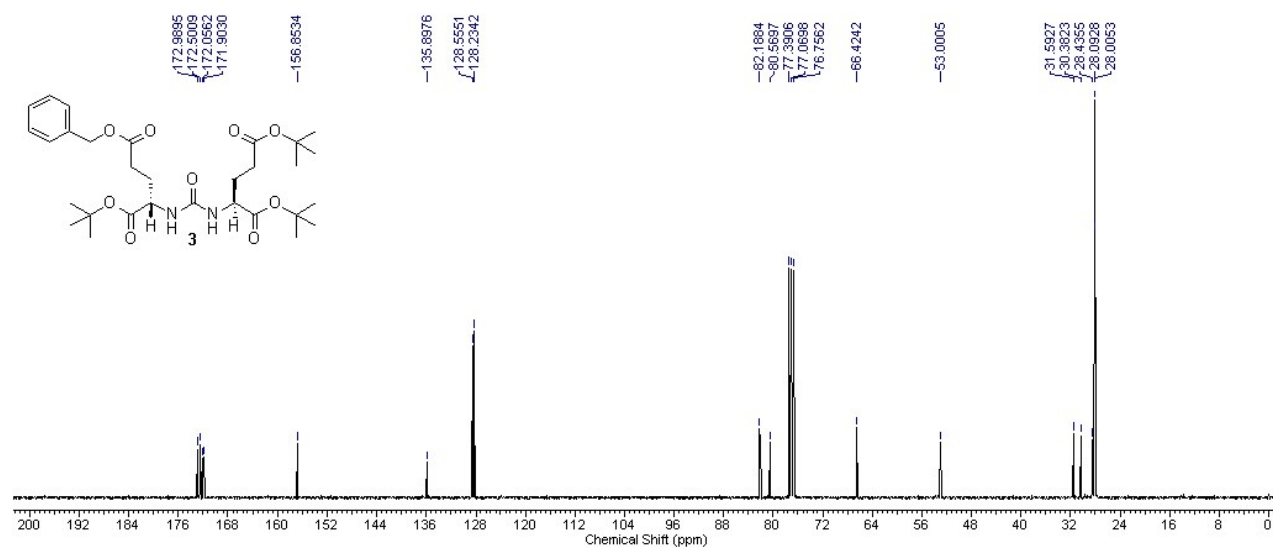

# <sup>1</sup>H NMR spectrum of 4

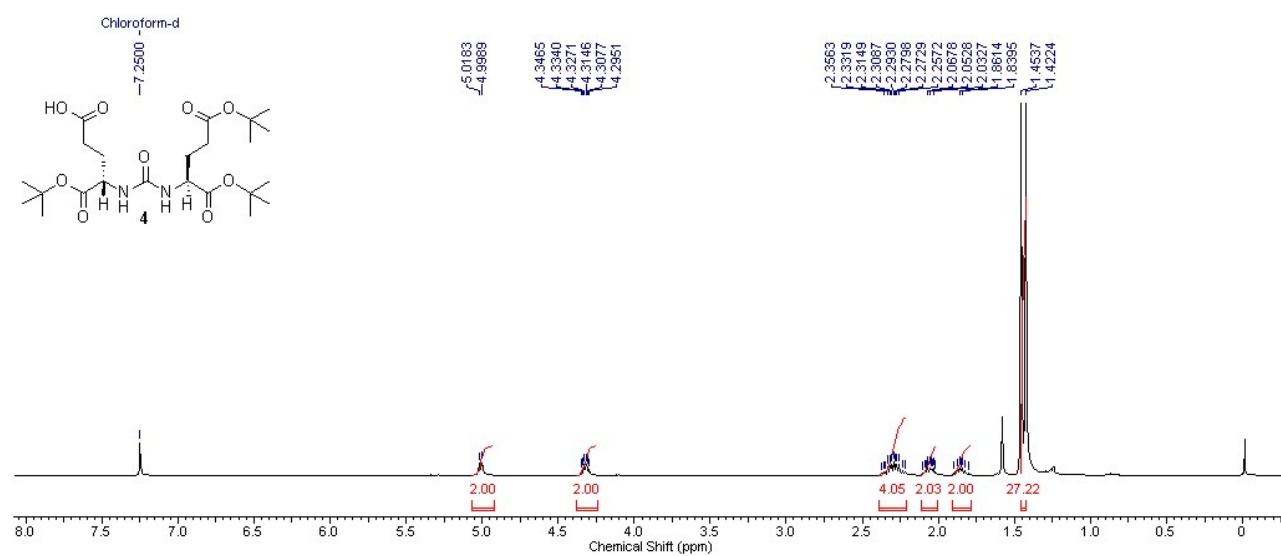

# <sup>13</sup>C NMR spectrum of 4

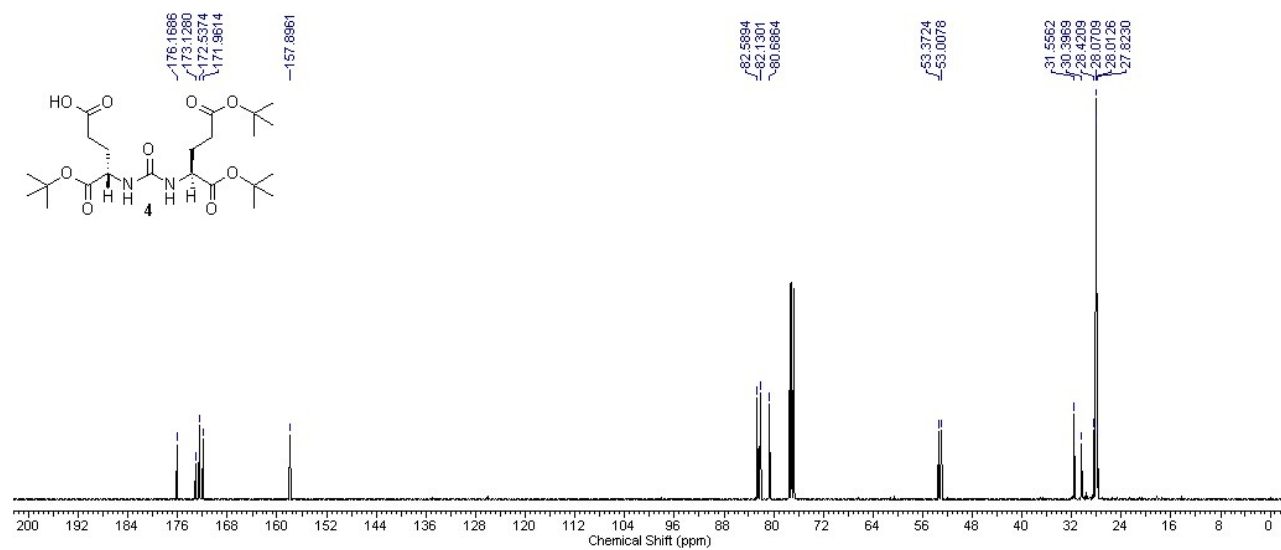

# High resolution mass spectrometry data DUPA-SH Linker 11

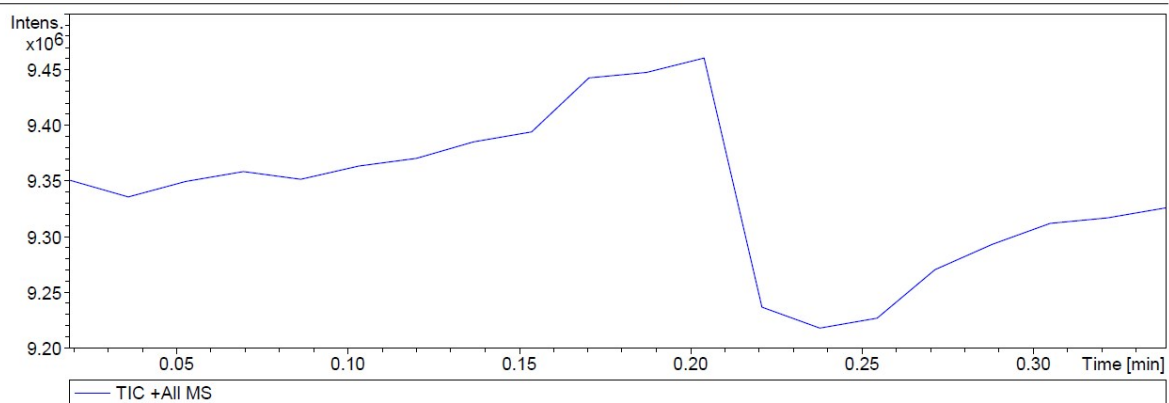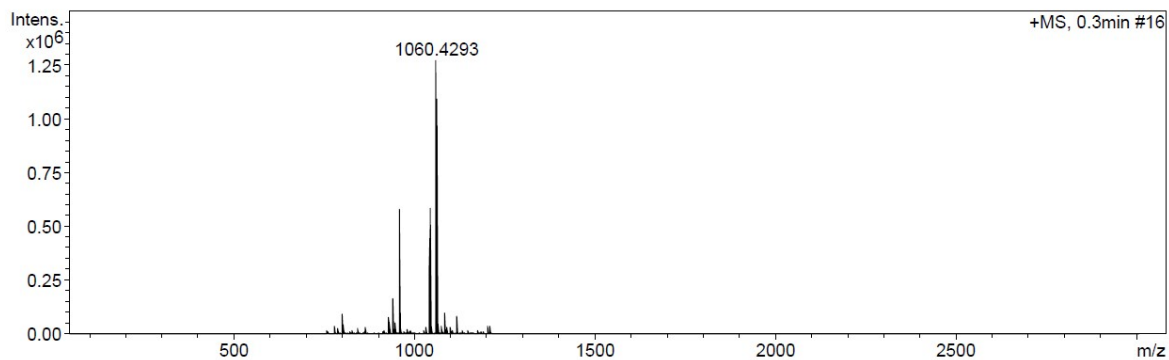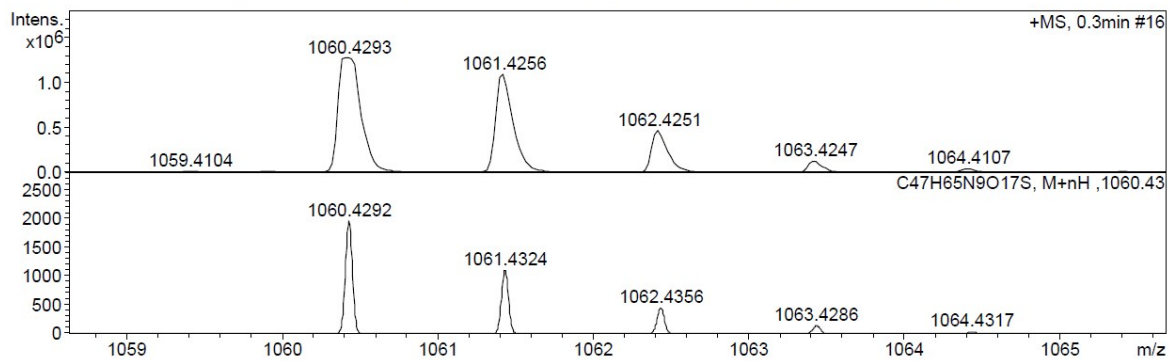

Analytical LC data of DUPA-SH linker 11

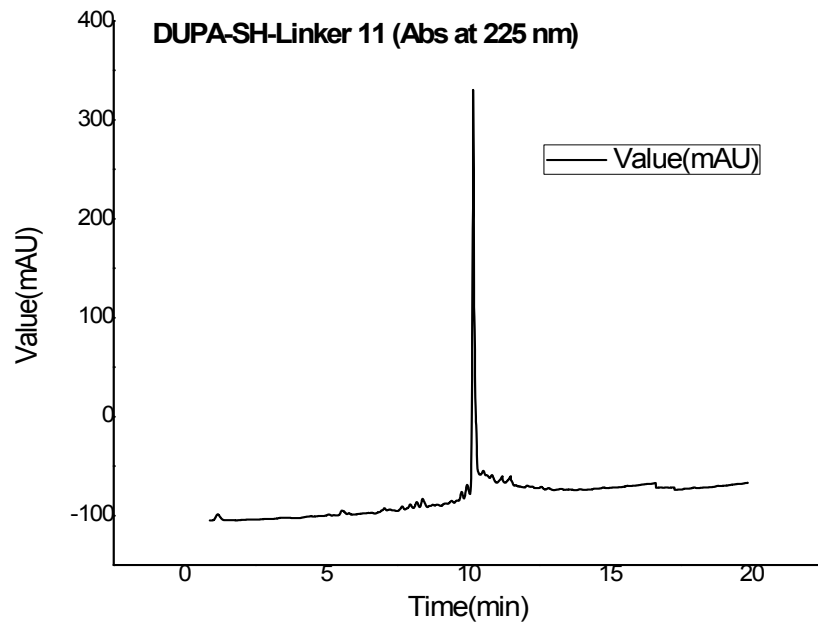



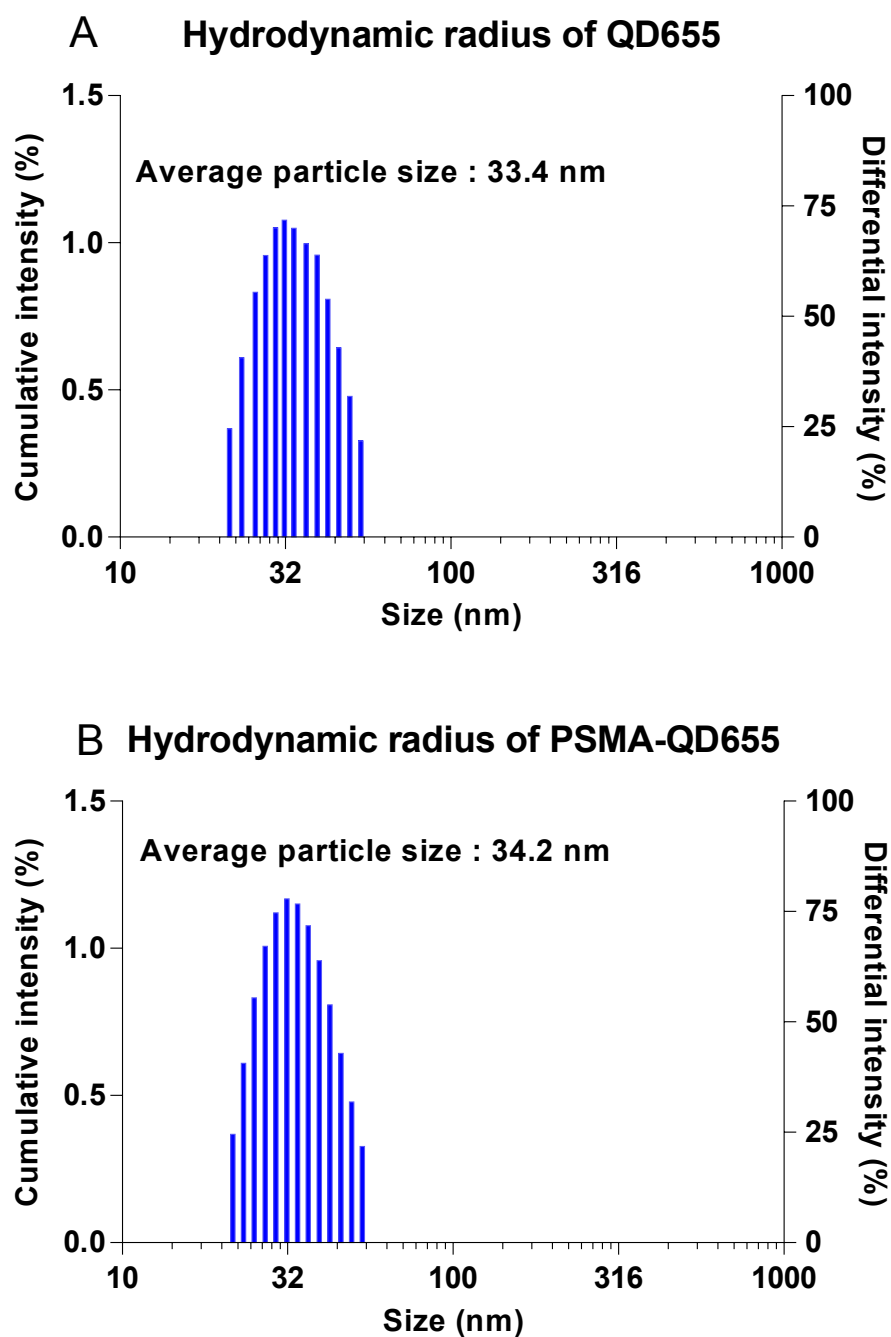

**Fig F1.** Characterization of PSMA-QD655 nanoparticles. Hydrodynamic radius value of (A) QD655 (B) and PSMA-QD655.

**Table 1.** Particle characterization data of QD655 and PSMA-QD655

| <b>Nanoparticle</b> | <b>Average particle size (nm)</b> | <b>Zeta potential (mV)</b> |
|---------------------|-----------------------------------|----------------------------|
| QD655               | 33.4                              | -2.1133 ± 0.308            |
| PSMA-QD655          | 34.2                              | -1.3567 ± 0.128            |

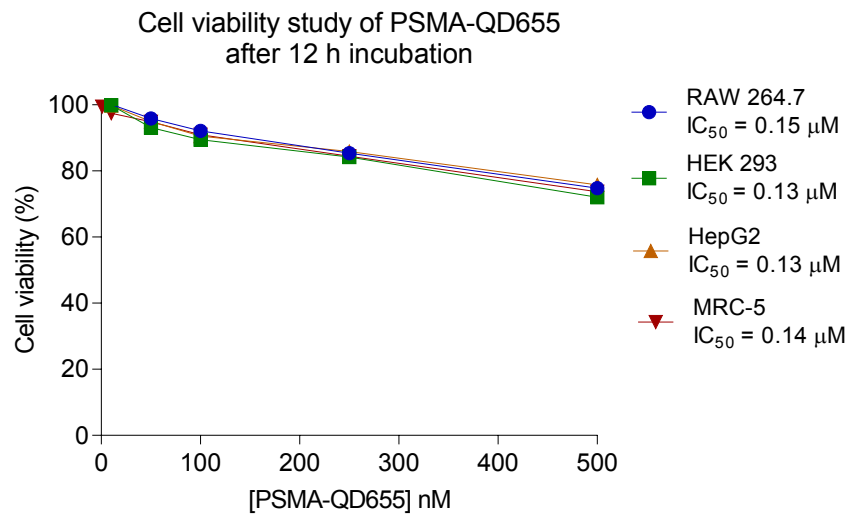

**Fig. F2.** Cytotoxicity study of PSMA-QD655 in RAW 264.7, HEK 293, HepG2 and MRC-5 cell for 12 h incubation

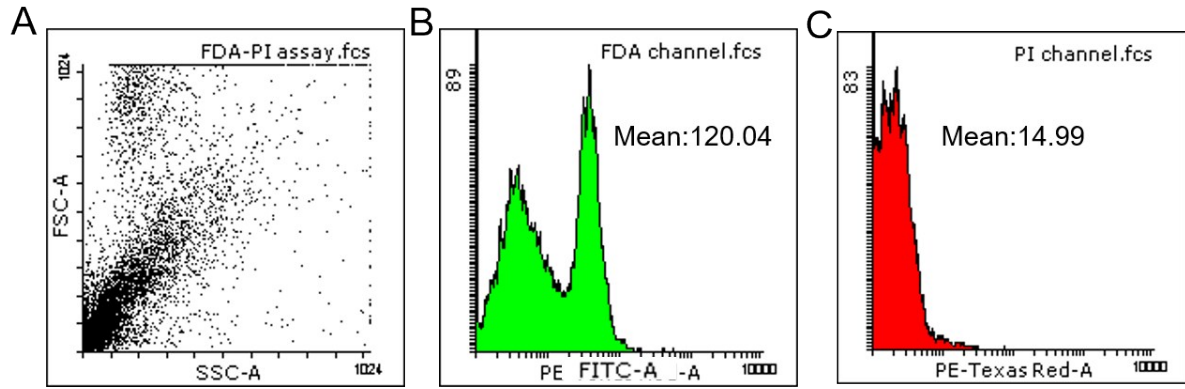

**Fig. F3.** Flow cytometry analysis of LNCaP spheroid co-labelled with fluorescein diacetate (FDA) and propidium iodide (PI) stain. (A) Dot plot of LNCaP cells. (B) Histogram of cells stained with FDA showing MFI measured in FITC-A channel. (C) Histogram of cells stained with PI showing MFI measured in PE-Texas-Red-A channel.
